# Supplementary material for: Digital Tool-Assisted Hospitalization Detection in the Tailored Antiplatelet Initiation to Lessen Outcomes due to Decreased Clopidogrel Response After Percutaneous Coronary Intervention Study Compared to Traditional Site-Coordinator Ascertainment: Intervention Study
Source: PubMed Central journal article supplement (PMC10674150; doi:10.2196/47475), 2023-11-10
Supplement: jmir_v25i1e47475_app1.pdf [file jmir_v25i1e47475_app1.pdf]

# Supplementary Material

Digital Tool-Assisted Hospitalization Detection in the TAILOR-PCI Study Compared to Traditional Site-Coordinator Ascertainment: An Intervention Study Avram et al.

Supplementary Figure 1.

## A. Geofencing Permission Prompt

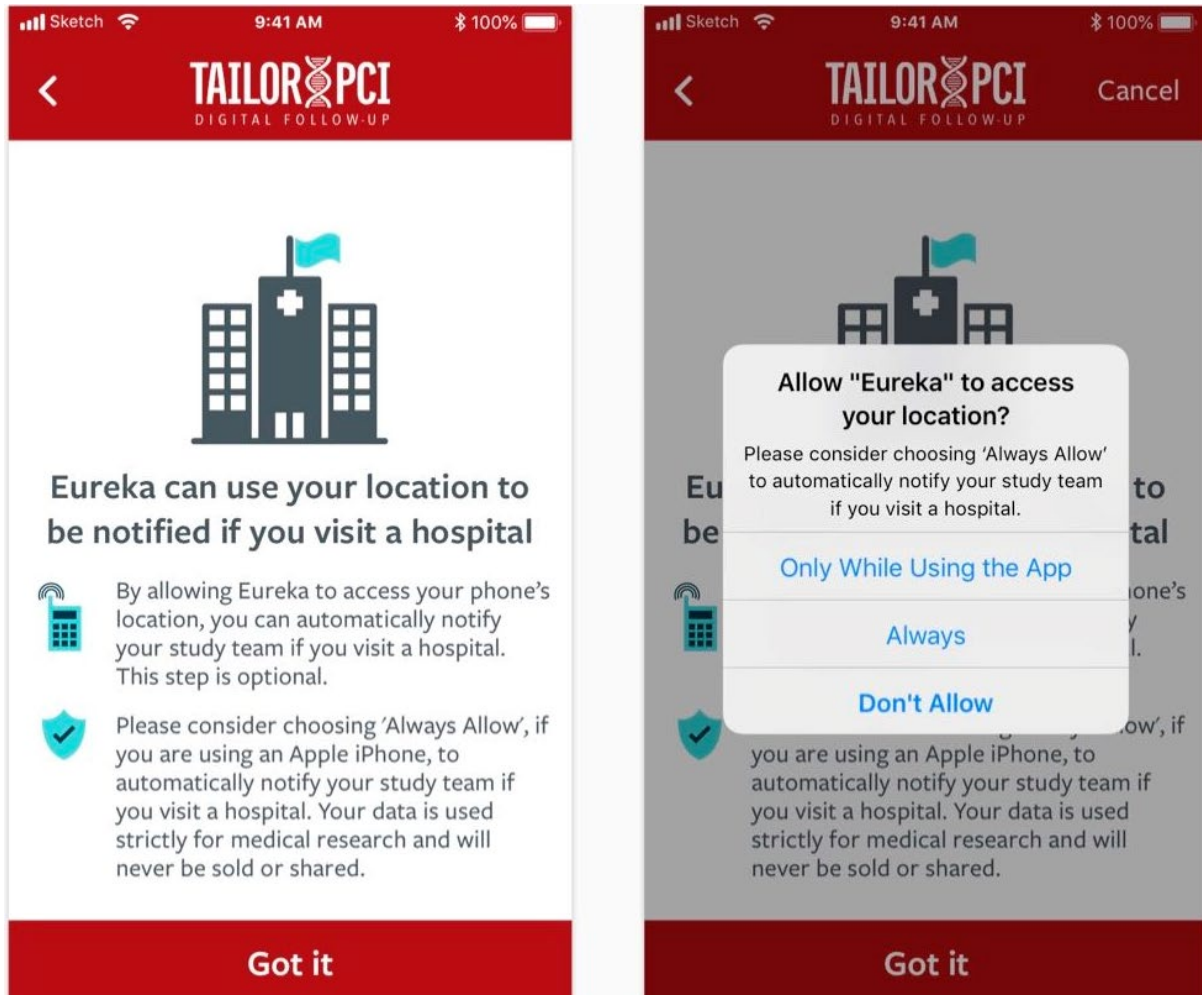

## B. Geofencing Triggered Survey Prompt

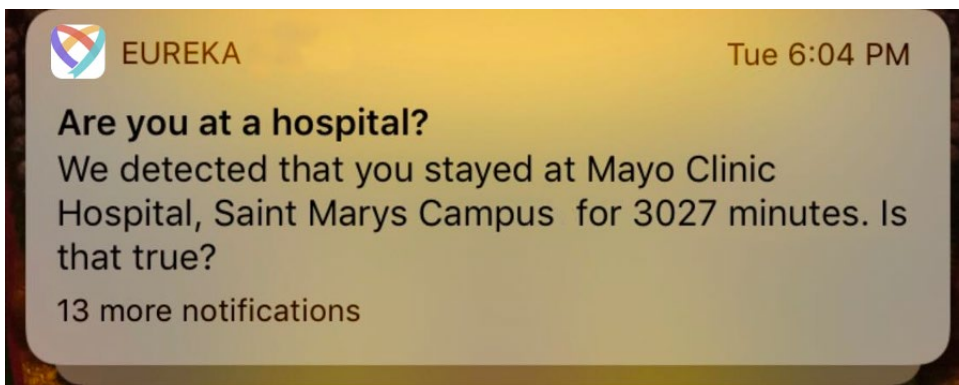

## Supplementary Table 1. Geofencing-Triggered Hospitalization Survey

- 1. Looks like you were near/at a hospital. Were you there for your medical care?**
  - a. Yes
  - b. No
- 2. Did you stay at the hospital overnight? (triggered by answer to 1)**
  - a. YES, I was hospitalized and I stayed overnight
  - b. NO, I was discharged during the same day
  - c. NO, I was an outparticipant
- 3. When were you admitted at the hospital? (triggered by answer to 2)**
  - a. Date
- 4. When did you leave the hospital? (triggered by answer to 2)**
  - a. Date
- 5. Which hospital/clinic did you go to? (triggered by answer to 2)**
  - a. City
  - b. State/Province
  - c. Hospital Name
- 6. Was the main reason that you went to the emergency room or were admitted to the hospital related to your heart or heart condition? (You may want to look at the papers you received when you were discharged) (triggered by answer to 2)**
  - a. Yes
  - b. No
  - c. I don't know
- 7. What was the main reason for your hospitalization? (You may want to look at the papers you received when you were discharged) Pick all that apply. (triggered by answer to 2)**
  - a. Heart attack, myocardial infarction (MI), STEMI or NSTEMI
  - b. Angina or Chest Pain
  - c. Heart Failure or pulmonary edema (fluid in the lungs)
  - d. Stroke or Transient Ischemic Attack [TIA]
  - e. Bleeding
  - f. Arrhythmia (abnormal heart rhythm)
  - g. Other
  - h. I don't know
- 8. Please describe any other diagnosis you had when you came to the hospital or emergency room. (triggered by answer to 2)**
  - a. Other diagnosis

Supplementary Table 2.

| TAILOR-PCI Extended Follow-Up participants   |                                                                                                    |                                                                       |         |
|----------------------------------------------|----------------------------------------------------------------------------------------------------|-----------------------------------------------------------------------|---------|
| Variable                                     | Refused to participate or not invited to the Digital Study - Not eligible for geofencing* (N=4645) | Digital Study Participant - Eligible to consent to geofencing (N=102) | P Value |
| Age at randomization                         |                                                                                                    |                                                                       | 0.019   |
| Mean, SD                                     | 62.2 (11.0)                                                                                        | 64.7 (8.9)                                                            |         |
| Median (min, max)                            | 62 (21, 95)                                                                                        | 64 (47, 87)                                                           |         |
| Male, n (%)                                  | 3506 (75%)                                                                                         | 83 (81%)                                                              | 0.17    |
| Caucasian, n (%)                             | 2924 (63%)                                                                                         | 92 (90%)                                                              | <.001   |
| Country, n (%)                               |                                                                                                    |                                                                       | <.001   |
| Canada                                       | 1005 (22%)                                                                                         | 20 (20%)                                                              |         |
| Korea                                        | 1217 (26%)                                                                                         | 0 (0%)                                                                |         |
| Mexico                                       | 91 (2%)                                                                                            | 0 (0%)                                                                |         |
| USA                                          | 2332 (50%)                                                                                         | 82 (80%)                                                              |         |
| Body Mass Index, n (%)                       |                                                                                                    |                                                                       | 0.06    |
| <25                                          | 1230 (27%)                                                                                         | 16 (16%)                                                              |         |
| 25-30                                        | 1746 (38%)                                                                                         | 45 (44%)                                                              |         |
| 30+                                          | 1651 (36%)                                                                                         | 41 (40%)                                                              |         |
| Diabetes, n (%)                              | 1264 (27%)                                                                                         | 20 (20%)                                                              | 0.09    |
| Hypertension, n (%)                          | 2908 (63%)                                                                                         | 68 (67%)                                                              | 0.40    |
| Dyslipidemia, n (%)                          | 2385 (51%)                                                                                         | 73 (72%)                                                              | <.001   |
| Any history of heart failure, n (%)          | 400 (9%)                                                                                           | 2 (2%)                                                                | 0.017   |
| Heart failure > 2 weeks, n (%)               | 346 (7%)                                                                                           | 1 (1%)                                                                | 0.013   |
| eGFR (MDRD)<60, n (%)                        | 455 (11%)                                                                                          | 13 (14%)                                                              | 0.27    |
| Cigarette Use, n (%)                         | 1161 (25%)                                                                                         | 6 (6%)                                                                | <.001   |
| History of MI (excluding index event), n (%) | 662 (14%)                                                                                          | 13 (13%)                                                              | 0.67    |
| Peripheral Artery Disease, n (%)             | 116 (2%)                                                                                           | 3 (3%)                                                                | 0.78    |
| History of PCI, n (%)                        | 1068 (23%)                                                                                         | 26 (25%)                                                              | 0.55    |
| History of CABG, n (%)                       | 328 (7%)                                                                                           | 11 (11%)                                                              | 0.15    |
| Stroke/TIA, n (%)                            | 126 (3%)                                                                                           | 1 (1%)                                                                | 0.28    |
| Family History of CAD, n (%)                 | 1760 (38%)                                                                                         | 55 (54%)                                                              | <.001   |
| Chronic lung disease, n (%)                  | 162 (3%)                                                                                           | 4 (4%)                                                                | 0.81    |
| Currently on dialysis, n (%)                 | 3 (0%)                                                                                             | 0 (0%)                                                                | 0.80    |

| <b>TAILOR-PCI Extended Follow-Up participants</b>         |                                                                                                           |                                                                              |                |
|-----------------------------------------------------------|-----------------------------------------------------------------------------------------------------------|------------------------------------------------------------------------------|----------------|
| <b>Variable</b>                                           | <b>Refused to participate or not invited to the Digital Study - Not eligible for geofencing* (N=4645)</b> | <b>Digital Study Participant - Eligible to consent to geofencing (N=102)</b> | <b>P Value</b> |
| Education level, n (%)                                    |                                                                                                           |                                                                              | <.001          |
| Less than HS                                              | 532 (16%)                                                                                                 | 2 (2%)                                                                       |                |
| HS grad/some college                                      | 1338 (39%)                                                                                                | 22 (22%)                                                                     |                |
| Associate/Bachelor                                        | 932 (27%)                                                                                                 | 48 (48%)                                                                     |                |
| Graduate/PhD                                              | 309 (9%)                                                                                                  | 23 (23%)                                                                     |                |
| Prefer not to answer                                      | 286 (8%)                                                                                                  | 4 (4%)                                                                       |                |
| Frequency of internet use, n (%)                          |                                                                                                           |                                                                              | <.001          |
| Does not use                                              | 837 (25%)                                                                                                 | 2 (2%)                                                                       |                |
| About daily                                               | 1697 (50%)                                                                                                | 91 (92%)                                                                     |                |
| About once a week                                         | 251 (7%)                                                                                                  | 1 (1%)                                                                       |                |
| Occasionally (less than once a week)                      | 252 (7%)                                                                                                  | 4 (4%)                                                                       |                |
| Don't know                                                | 141 (4%)                                                                                                  | 0 (0%)                                                                       |                |
| Prefer not to answer                                      | 219 (6%)                                                                                                  | 1 (1%)                                                                       |                |
| Which of the following do you have? A desktop, laptop,    | 1875 (82%)                                                                                                | 88 (93%)                                                                     | 0.007          |
| A smartphone (Android, iPhone, Blackberry, etc.), n (%)   | 1873 (82%)                                                                                                | 94 (99%)                                                                     | <.001          |
| A tablet computer, n (%)                                  | 863 (39%)                                                                                                 | 42 (48%)                                                                     | 0.10           |
| A smart-speaker (Alexa, GoogleHome, HomePod, etc.), n (%) | 311 (15%)                                                                                                 | 26 (32%)                                                                     | <.001          |
| Ever downloaded an app to your phone?, n (%)              | 1503 (80%)                                                                                                | 90 (96%)                                                                     | 0.007          |

## Supplementary Table 3. Monthly Hospitalization Survey

- 1. Were you hospitalized in the last month?**
  - a. YES, I was hospitalized, and I stayed overnight
  - b. NO, I was not hospitalized
- 2. When were you admitted at the hospital? (triggered by answer to 1)**
  - a. Date
- 3. When did you leave the hospital? (triggered by answer to 1)**
  - a. Date
- 4. Which hospital/clinic did you go to? (triggered by answer to 1)**
  - a. City
  - b. State/Province
  - c. Hospital Name
- 5. Was the main reason that you went to the emergency room or were admitted to the hospital related to your heart or heart condition? (You may want to look at the papers you received when you were discharged.) (triggered by answer to 1)**
  - a. Yes
  - b. No
  - c. I don't know
- 6. What was the main reason for your hospitalization? (You may want to look at the papers you received when you were discharged) Pick all that apply. (triggered by answer to 1)**
  - a. Heart attack, myocardial infarction (MI), STEMI or NSTEMI
  - b. Angina or Chest Pain
  - c. Heart Failure or pulmonary edema (fluid in the lungs)
  - d. Stroke or Transient Ischemic Attack [TIA]
  - e. Bleeding
  - f. Arrhythmia (abnormal heart rhythm)
  - g. Other
  - h. I don't know
- 7. Please describe any other diagnosis you had when you came to the hospital or emergency room. (triggered by answer to 1)**
  - a. Other diagnosis
